# Supplementary material for: Chemical profiling of cerebrospinal fluid by multiple reaction monitoring mass spectrometry
Source: Royal Society of Chemistry journal article supplement (doi:10.1039/c6an01618a), 2016-01-01
Supplement: c6an01618a2.xlsx [file c6an01618a2.xlsx]

## Sheet: Table S4
Note 1: "h" in the name of the sample means HC and "p" means PD group. The number of the sample is followed by the number of the replicate (e.g. h_105-1, h_105-2, h_105-3 and h_105-4 are the four replicates for the sample 105, which is from the HC group.
Note 2: the MRM is represented by the m/z of the parent ion followed by an arrow (->) and the m/z of the fragment (e.g. 76.2->58.3)
Sa mple	h_105-1	h_105-2	h_105-3	h_105-4	CV	h_112-1	h_112-2	h_112-3	CV	h_119-1	h_119-2	h_119-3	h_119-4	CV	h_127-1	h_127-2	h_127-3	h_127-4	CV	h_128-1	h_128-2	h_128-3	h_128-4	CV	h_130-1	h_130-2	h_130-3	h_130-4	CV	h_132-1	h_132-2	h_132-3	h_132-4	CV	h_137-1	h_137-2	h_137-3	h_137-4	CV	h_140-1	h_140-2	h_140-3	h_140-4	CV	h_143-1	h_143-2	h_143-3	h_143-4	CV
76.2 -> 58.3	13.7228	5.2805	7.7754	7.16756	0.429958	21.5389	8.82608	4.57796	0.757707	81.356	119.309	101.525	96.2812	0.157235	30.3609	39.2451	50.6718	36.3977	0.217425	16.8949	19.9911	22.7118	22.0669	0.128273	5.78182	4.88664	2.22851	0.495697	0.725055	35.1493	5.31868	2.80017	2.28009	1.39606	15.6607	22.0775	17.3958	16.3087	0.162419	162.557	170.867	134.012	109.206	0.195235	64.0842	61.5736	47.9146	55.5433	0.125676
76.2 -> 59.4	49.4661	31.9569	41.2733	37.1047	0.185237	23.3639	20.6493	37.4256	0.331724	540.584	548.971	498.376	487.336	0.0588003	211.031	229.369	225.215	266.145	0.100831	92.5245	74.1666	77.5191	89.5232	0.107333	11.0493	14.5732	27.2271	14.5223	0.42252	28.4821	27.3399	30.5006	28.2518	0.0465242	146.561	152.549	126.641	146.461	0.0790305	270.619	239.078	211.41	217.257	0.114275	212.17	167.204	174.962	165.107	0.122054
78.2 -> 61.5	148.187	146.765	150.542	125.894	0.0798662	126.065	123.525	110.031	0.0718905	178.534	642.572	1142.56	883.396	0.575957	212.362	116.874	118.652	116.787	0.336262	217.102	255.754	327.234	294.748	0.174379	133.673	103.741	96.8535	98.8942	0.158525	82.0328	113.008	72.7944	70.4213	0.231932	92.1797	75.367	87.6073	93.1392	0.0938161	2874.89	1835.23	1276.56	1373.33	0.397677	344.505	303.026	298.519	287.175	0.0812081
79.2 -> 61.5	143.517	182.749	195.688	147.684	0.154036	261.289	175.622	159.734	0.274672	411.291	1923.11	4969.64	3724.08	0.726286	211.598	373.941	402.786	250.964	0.299702	210.684	296.071	389.52	309.929	0.242902	222.263	146.789	216.275	170.885	0.192185	199.786	208.72	179.067	115.34	0.23975	129.855	160.055	139.516	147.148	0.0884624	8317.54	6040.87	2616.72	3724.53	0.489803	874.989	661.973	907.444	556.708	0.225037
88.1 -> 57.5	0.191928	0.280805	0.622611	0.300981	0.539721	0.33953	0.26465	0.594801	0.433103	0.268717	0.29812	9.39314	1.65358	1.50667	0.30295	2.38328	0.301654	0.934481	1.00089	0.351078	0.186021	0.192419	0.356119	0.349886	0.85131	0.195032	2.70192	0.228783	1.18454	0.352026	0.181709	0.162973	0.15491	0.43881	0.392287	0.206976	0.187818	0.414355	0.397815	3.63303	3.35278	6.03543	4.96194	0.276584	2.25437	0.497695	0.838613	4.38929	0.886294
88.1 -> 71.3	0.601373	3.16419	1.3683	2.79283	0.606794	0.721501	1.56805	0.561385	0.569218	11.1477	12.0651	15.993	5.15633	0.403916	4.15569	10.552	11.6559	18.7131	0.529156	4.63177	5.05977	0.423321	2.5803	0.670857	3.80134	2.55167	1.44333	6.51487	0.609911	1.61612	2.29347	1.12105	0.179115	0.683188	1.27685	5.32619	0.841942	2.53792	0.809144	39.4868	17.0924	20.5608	29.4336	0.375927	7.63652	8.70426	9.78743	12.5514	0.218428
113.1 -> 59.2	0.268699	4.13673	5.40079	8.23849	0.733228	3.98947	1.5482	0.608167	0.851948	2.16602	5.73443	6.53353	3.52942	0.446244	31.711	27.885	39.0461	44.7258	0.209758	0.289486	1.40136	1.94343	3.59867	0.762031	2.16966	2.42707	3.34854	5.39819	0.439188	0.645382	0.682637	0.345699	2.39627	0.915456	2.74601	6.60945	7.60986	12.1134	0.529653	379.931	410.783	389.455	327.695	0.0936137	170.346	180.62	168.393	193.34	0.0642305
113.1 -> 70	0.191928	0.232862	0.21719	0.636961	0.663533	0.601251	0.324196	0.207178	0.536047	1.25401	1.83256	0.568133	0.37339	0.662835	0.230506	0.228373	1.14025	0.176317	1.04748	0.184778	0.186021	0.295042	0.349871	0.323857	0.177356	0.68803	0.1732	0.168864	0.852932	0.346693	0.235731	0.202481	0.15491	0.347058	0.238449	0.26217	0.23963	0.194229	0.121729	0.83381	0.351136	0.414404	0.468931	0.418853	0.35999	0.162292	0.167723	0.158078	0.46564
113.1 -> 77.3	3.186	9.47202	25.223	35.2008	0.799384	3.93289	1.56805	4.39083	0.459454	12.2307	17.3699	25.2535	18.9006	0.290944	77.9505	78.5839	103.534	98.767	0.148889	2.96261	7.70127	10.3457	7.94707	0.426919	5.71679	9.36154	8.4233	5.20754	0.282536	3.42426	3.30023	2.0495	1.5249	0.36338	19.2836	25.3546	29.8825	14.9232	0.294756	1006.56	818.791	1007.99	766.68	0.139644	326.21	405.021	403.622	436.906	0.119782
115.1 -> 79.2	2.3799	2.78065	8.62968	7.30755	0.599432	1.97352	1.56144	1.08267	0.289655	4.20175	19.1674	34.2395	28.5999	0.609322	47.9715	27.0944	38.8952	32.648	0.244306	0.400352	4.89236	1.82798	2.66152	0.768545	0.857222	5.30921	2.62687	2.17889	0.681158	2.40018	0.938013	2.59768	0.280775	0.724716	7.9688	5.08472	6.04903	9.88625	0.293761	411.402	349.029	429.79	340.913	0.116062	126.911	171.824	174.026	158.32	0.137622
115.1 -> 97.1	3462.74	3873.56	3774.42	3393.67	0.0644686	2295.96	2154.05	2167.93	0.0354643	2640.34	2541.57	2760.83	2764.58	0.0399927	2760.76	2310.48	2576.82	2308	0.0886915	2780.63	3133.08	2842.7	2724.26	0.0633507	2300.61	1836.39	1926.97	1672.42	0.137577	1965.29	1820.77	1912.28	1810.44	0.0396644	2324.34	2039.18	1933.01	1954.44	0.0874182	6328.24	5647.51	4913.42	4850.37	0.128221	3065.61	2501.75	2421.43	2504.35	0.113363
116.1 -> 70	41.6099	34.0801	40.8824	33.0869	0.119003	50.887	66.5066	61.338	0.133562	40.1365	102.571	175.013	114.168	0.511876	41.2276	59.9744	49.0308	49.9036	0.153686	45.9789	58.4292	61.1186	56.0168	0.119317	75.0808	48.8826	72.4554	59.6089	0.189658	55.6682	54.3311	44.7236	56.6004	0.103811	45.136	52.3788	50.4582	56.0221	0.0889981	78.8188	59.3193	72.0745	54.5704	0.169199	40.9504	62.8232	56.041	34.3977	0.270606
116.1 -> 88.2	10.1274	7.41735	2.39633	1.79189	0.739682	14.6139	15.3497	7.13761	0.367409	31.7248	174.97	367.762	225.83	0.693499	49.3809	13.7024	13.7373	3.44406	1.00341	8.25342	17.1449	20.608	6.79749	0.509855	7.3189	4.8758	4.37619	13.7869	0.570142	25.9486	15.8725	9.54624	14.1453	0.422294	1.31531	2.93907	5.41433	7.62024	0.640949	264.615	178.196	101.476	139.305	0.408956	12.9774	7.71969	7.46095	9.11582	0.273142
116.1 -> 98.1	358.258	357.642	252.845	249.465	0.202508	436.02	60.0359	82.5102	1.09349	3580.97	5077.63	4644.7	4592.07	0.141659	1299.41	2144.41	2171.96	2426.9	0.244164	376.245	1069.2	1270.66	1385.88	0.440945	419.069	223.068	99.1167	294.128	0.516923	926.491	741.388	450.688	514.443	0.331244	169.099	198.697	108.565	75.1212	0.407544	9890.1	6491.99	4784.74	6642.27	0.30667	916.854	788.512	1355.1	443.619	0.430066
116.1 -> 98.4	125.866	137.608	138.06	113.484	0.0904097	243.415	85.7863	42.6251	0.852761	1521.63	2253.31	1769.53	2128.6	0.174447	761.874	960.977	897.577	1016.64	0.120584	206.822	489.366	547.681	529.511	0.359885	134.903	58.2062	139.703	128.255	0.332523	377.324	171.057	410.429	499.92	0.381382	126.639	100.453	84.803	91.9997	0.180906	3705.95	3041.97	2139.41	2649.33	0.22912	464.47	416.825	643.449	245.89	0.369315
117 -> 81.2	8117.29	9250.72	8863.76	8084.17	0.0669719	5263.31	5053.51	5072.08	0.0226404	5680.87	5400.51	5793.9	5424.01	0.0347165	6071.19	5932.85	6024.36	5970.34	0.0101158	6308.55	6050.77	6241.27	6264.96	0.0183188	5713.99	4930.35	4906.45	4332.23	0.114151	4826.13	4785.41	4743.68	4699.29	0.011445	5832.72	5365.62	5108.78	5200.74	0.0598624	12110.1	12703.4	11122.6	9748.94	0.113083	6609.7	5286.75	5334	5615	0.107885
117 -> 99.1	4954.66	5436.01	5620.23	5664.74	0.0599664	5183.43	5079.44	5143.21	0.010211	6595.61	8011.42	9473.14	8173.17	0.145979	4439.65	4324.93	4601.58	4318.55	0.0299728	4215.56	5046.02	4977.67	4946.94	0.0812111	4432.12	4433.57	4782.48	4470.18	0.0374232	4410.94	4464.25	4661.44	4605.23	0.0258739	5324.01	5069.74	4736	4742.74	0.0571286	10320	10157.4	9728.65	9928.74	0.0258179	5162.82	5820.26	5866.4	5580.25	0.0573988
120.1 -> 84	144.31	205.508	264.827	249.22	0.249883	166.412	197.35	202.366	0.103186	261.844	364.496	345.728	343.341	0.138855	295.699	317.825	362.769	343.483	0.0888866	171.345	217.359	236.361	277.66	0.195461	191.119	209.362	193.961	180.472	0.0615826	155.921	202.876	196.723	186.473	0.112382	228.618	267.503	271.5	271.435	0.0802565	1289.53	1363.12	1271.92	1283.28	0.0318111	605.722	694.28	703.196	676.631	0.0660091
120.1 -> 102.4	116.129	155.894	158.092	173.512	0.162183	167.459	172.955	154.434	0.057667	240.583	286.379	267.146	296.88	0.0906568	247.84	237.62	270.885	258.81	0.0563855	143.807	170.749	180.296	187.25	0.111735	149.724	176.726	171.855	159.93	0.0738254	163.388	143.653	148.221	143.069	0.0634247	216.627	173.991	220.835	183.779	0.117764	1186.29	1228.18	1005.68	987.448	0.111671	464.393	538.382	586.093	556.065	0.0965707
122.1 -> 68.4	0.191928	0.205467	0.22443	3.2128	1.56763	0.226353	0.218336	0.25396	0.0802459	0.244288	0.473485	0.691229	0.275597	0.490747	0.197576	0.304498	2.07538	3.32064	1.01869	0.184778	0.297634	1.02623	0.199926	0.942338	0.177356	0.24379	0.271347	0.288702	0.199449	0.197348	0.550039	2.7409	0.159751	1.35072	0.246141	0.227674	0.317347	0.440252	0.313011	31.2679	191.312	203.6	161.759	0.538272	21.4401	101.465	95.5261	104.842	0.492121
122.1 -> 77.3	0.191928	0.486271	0.260628	0.209987	0.473046	0.268794	0.205104	0.200495	0.169806	0.325717	0.543631	0.359818	0.293378	0.29424	0.480769	0.175672	0.180992	0.199826	0.570733	0.184778	0.26043	0.24373	0.218669	0.145047	0.254211	0.173362	0.1732	0.283255	0.255062	0.266687	0.275019	0.158034	0.169433	0.285851	0.661503	3.11845	0.803083	0.971144	0.835546	0.750429	0.804214	0.35065	4.52573	1.21648	0.177044	0.21098	1.3526	1.34366	0.864362
132.1 -> 44.5	395.115	420.988	439.961	412.47	0.04469	412.048	443.355	423.231	0.0372234	540.096	593.347	606.028	493.95	0.0923612	379.004	356.479	378.949	356.061	0.0356642	367.068	397.54	448.611	426.005	0.0862194	407.051	442.078	470.238	394.128	0.0805053	305.751	305.036	316.572	328.168	0.0346908	417.385	364.886	380.182	362.535	0.066442	534.829	587.019	586.722	550.797	0.0464888	426.028	456.473	441.884	450.158	0.0296894
132.1 -> 90.5	649.624	716.339	725.856	735.15	0.0549647	603.981	681.342	617.156	0.0652651	876.659	939.464	953.697	982.513	0.0476438	516.452	640.294	600.876	612.202	0.0899821	520.372	624.411	657.463	676.863	0.112489	649.804	662.632	678.974	619.256	0.0387193	517.324	550.402	500.474	493.491	0.0492308	648.834	654.246	653.036	639.589	0.0102365	931.056	928.029	920.689	1009.77	0.0441394	694.451	728.145	735.507	749.684	0.0322383
133 -> 115.3	3276.71	3990.54	4935.09	4924.12	0.187544	2958.92	2970.88	3103.16	0.0265863	3678.35	3889.96	3925.11	3977.94	0.033972	3331.04	3190.96	3684.44	3462.76	0.0614064	2428.83	2903.8	2845.79	2998.72	0.0900614	2677.61	2657.78	2932.99	2767.02	0.0454678	2578.81	2712.4	2742.84	2709.72	0.0271738	4327.84	4019.23	3791.57	3889.55	0.0582241	2350.7	2300.13	2558.72	4048.87	0.295038	1272.12	1378.01	1481.91	1442.73	0.0657775
134.1 -> 72.4	15.5205	7.97211	6.00168	18.1569	0.490607	8.27604	3.55293	3.07425	0.578744	300.71	323.188	298.791	275.268	0.0653825	730.618	573.738	486.779	570.474	0.172379	1462.09	1546.51	1647.18	1583.38	0.0495445	504.933	467.508	420.27	396.606	0.108219	346.698	336.506	383.48	366.687	0.0584022	517.311	492.107	392.669	404.74	0.137824	359.944	385.909	333.925	438.265	0.117386	256.927	299.77	233.903	247.892	0.109355
134.1 -> 115.8	270.381	295.297	376.187	431.341	0.215726	230.795	242.803	247.511	0.0358581	377.612	429.538	381.132	402.594	0.0601282	283.134	322.258	325.599	342.42	0.0787877	221.253	279.515	269.13	319.782	0.148692	243.699	237.679	283.8	252.789	0.0805611	220.736	251.397	227.539	231.03	0.0566993	342.466	400.624	346.498	335.045	0.0842908	274.323	235.782	263.402	396.552	0.243506	113.769	161.021	182.623	138.982	0.198076
136.1 -> 100.2	43.6123	74.4338	101.051	111.713	0.367729	61.9642	66.9035	91.9468	0.218402	99.417	120.16	121.827	127.868	0.105567	103.826	149.86	247.887	263.518	0.40256	37.4299	80.3735	68.0008	78.546	0.300633	55.2406	77.6282	76.9644	67.9976	0.150396	54.2014	61.4325	47.8448	54.3106	0.101965	81.1726	118.942	109.427	125.744	0.180201	402.111	660.577	646.014	834.904	0.279799	241.973	383.063	454.339	433.154	0.252732
141 -> 81.1	29571.9	30514.4	30791.1	29419.4	0.0226226	31694.1	31528.9	31084	0.0100382	33178.4	32769.3	34898.7	33807.4	0.0275553	19728	19343.2	19570.7	20138.4	0.0170146	34961	31461.3	33201.5	32857	0.0434624	29837.7	28345.7	30129.4	27669.3	0.0406913	19415.9	18955.8	20587.6	20590.7	0.0418198	29312.8	29536.2	28546.1	28592.2	0.0173313	21734.4	25321.6	23557.7	20677.7	0.0896883	13648.4	12643.7	12071.6	12451.1	0.0529893
141 -> 83.2	15714.8	16748.4	18134.5	17948.4	0.0659107	15524.4	16570.6	16300.8	0.0336701	16090.5	15545.1	15806.7	16380.5	0.0225814	13137.1	12386.7	12586.5	12687.7	0.0249925	14105.4	13548.4	13978	14201.6	0.02065	14543.6	13811.3	14454.1	13703.4	0.0305693	12323.1	12162.9	12637.5	12439.9	0.0161284	16318.1	15679.6	14851.4	14845	0.0462692	10976.6	11874.2	11196.6	10557.3	0.0493352	6619.54	6313.3	6104.73	6433.68	0.0339108
142.1 -> 124.2	162.518	175.88	215.554	171.139	0.129715	132.176	147.311	151.654	0.0711491	239.573	282.995	211.175	298.756	0.155252	157.014	185.872	229.486	220.561	0.167994	160.683	146.591	180.168	153.581	0.0902805	130.623	108.243	143.623	111.82	0.13418	149.392	144.302	105.848	105.547	0.188867	163.683	144.401	142.34	122.047	0.118933	587.812	578.422	497.763	663.94	0.116777	253.941	249.897	256.886	199.331	0.11363
146.1 -> 109.9	34.3038	12.3759	15.8331	15.693	0.50962	46.0063	6.50377	8.14008	1.10549	586.633	724.441	360.992	372.341	0.344499	194.935	298.121	294.245	295.966	0.186888	34.2517	89.2157	106.671	80.7327	0.3979	23.5825	24.0377	9.00064	8.5031	0.534257	93.7297	63.8192	28.2288	3.89212	0.832648	14.33	4.33271	5.66044	5.03053	0.639442	1129.76	914.459	955.808	1259.57	0.15009	156.076	108.124	258.174	91.4743	0.488638
150.1 -> 114.3	4.86856	68.9615	142.115	167.038	0.767705	11.8199	73.9961	84.4349	0.691792	4.92647	100.352	102.567	78.7052	0.638747	6.40148	59.3946	136.48	107.783	0.736531	20.7629	75.2828	84.536	110.584	0.518861	5.64584	69.3447	87.4372	86.8777	0.621076	5.86177	72.3497	96.4304	69.2304	0.634689	7.3073	82.218	91.2341	111.85	0.623563	29.5407	39.5877	78.7899	196.918	0.890899	6.52704	37.9763	56.8201	52.8559	0.592416
151 -> 115.1	3450.65	4779.55	5957.47	6093.09	0.242656	3013.26	3334.84	3492.85	0.0745042	4067.46	4683.54	4498.35	4616.49	0.0619728	4973.33	4877.38	5817.31	6033.79	0.107917	2427.14	3085.59	3275.7	3402.22	0.142295	2943.18	3252.96	3702.64	3171.11	0.0974285	2417.02	2849.34	2785.44	2777.61	0.0724715	5405.53	5296.18	5025.63	5179.1	0.0311465	3318.83	6021.78	7122.66	10274.9	0.430559	2474	3443.18	3966.15	3889.18	0.199232
151 -> 83.23	1820.36	2402.02	3033.54	3082.32	0.23071	1665.39	1496.24	1701.4	0.0675791	1913.75	2181.42	2209.19	2295.61	0.0766653	2410.54	2409.46	2691.08	2771.7	0.0733072	1251.06	1531.18	1583.53	1754.57	0.136628	1698.62	1692.29	1717.63	1510.29	0.0585466	1303.56	1420.93	1381	1297.73	0.0445778	2848.14	2526.96	2463.15	2535.78	0.066632	1619.2	1342.14	1651.95	3427.88	0.475165	1148.26	963.49	1053.14	1072.84	0.0717078
153 -> 99.1	1159.91	1750	2120.23	2106.9	0.252301	1652.39	1573.52	1719.93	0.044447	2700.68	3298.09	3424.87	2939.35	0.107259	3685.5	3790.16	4514.14	4470.57	0.106456	1027.89	1742.38	1604	1879.63	0.239447	1722.27	1754.55	1821.23	1530.14	0.0731843	998.779	983.366	1139.93	1240.8	0.112194	2210.73	2522.02	2266.2	2398.93	0.0593849	18701.5	19626.8	19025.1	18767.9	0.0221454	10200.2	10833.7	11188.6	11338.5	0.0465001
153 -> 135	3687.22	4367.26	4839.41	4644.86	0.114884	3994.53	3779.47	3779.06	0.0322728	4960.78	5601.93	5610.54	5615.12	0.0595279	6207.76	5795.71	6638.55	6505.52	0.0594436	2872.27	3452.79	3470.36	3582.95	0.0957125	3825.71	3435.57	3327.94	3223.59	0.0761569	2962.86	2592.38	2883.49	2891.92	0.0579304	4825.78	4081.56	4002.14	4141.36	0.0890712	22994.5	21740.7	20737.3	21237.6	0.0446935	11496.1	10654.5	10945.5	10950.9	0.0319064
153 -> 55.3	113.672	157.025	199.887	191.823	0.237311	152.01	145.961	161.097	0.0497884	265.695	307.449	382.108	285.154	0.164285	365.134	385.301	418.068	439.124	0.0821995	109.647	173.155	157.546	194.503	0.227125	145.444	153.929	170.256	147.707	0.0725988	88.1719	94.091	112.599	110.867	0.119864	240.226	229.634	223.775	222.185	0.0356754	1874.07	1823.92	1816.82	1829.37	0.014087	920.407	1049.11	1017.63	1087.64	0.0701974
154 -> 136.1	8402.25	7425.11	7499.93	7062.14	0.0749785	6482.01	5147.84	5065.67	0.142865	10128.3	10780.9	9235.83	9158.48	0.078768	7297.01	6467.3	6538.52	6875.8	0.0558303	5770.44	5861.4	6186.77	6035.57	0.0310316	5361.8	4508.63	4728.53	4544.85	0.0826975	5420.64	3980.84	3883.91	4016.84	0.169276	6242.45	5509.26	5632.76	5533.33	0.0604164	18914.6	16490.2	16317.2	16202.5	0.0762254	6582.91	5495.03	5148.83	5760.62	0.106332
155 -> 119.1	100.289	159.285	214.388	189.681	0.296614	134.716	176.436	199.947	0.193914	249.507	386.486	438.722	382.262	0.221517	366.517	392.252	423.95	446.981	0.0866786	127.577	183.597	196.979	232.289	0.235044	184.38	192.432	204.734	156.711	0.110357	82.9715	84.7207	86.4249	89.514	0.0324424	230.718	285.917	230.375	287.724	0.125631	1416.83	1751.71	1581.33	1493	0.0922539	681.438	806.602	722.592	821.525	0.0885368
155 -> 137.1	1507.9	1652.62	1663.18	1696.74	0.0512947	1414.44	1245.26	1199.22	0.0881048	1905.56	2099.26	2101.6	2016.17	0.0454896	1764.31	1704.03	1938.63	1921.02	0.0632274	1374.83	1484.55	1436.74	1522.54	0.0438294	1249.75	1180.4	1159.37	1094.84	0.0545096	1159.54	980.046	1012.41	952.597	0.0898779	1415.49	1290.79	1300.22	1379.42	0.0451522	6147.62	6167.19	5583.44	5560.11	0.0576922	2703.47	2463.41	2499.27	2543.57	0.0414881
166 -> 105.2	6948.17	6187.46	5283.19	5106.94	0.145248	9889.09	9636.84	9260.94	0.0329418	11770	13264	12345.1	12348.8	0.0496952	3482.34	3370.86	3174.24	3092.81	0.0543727	10811.3	10020.9	10149	9053.67	0.0724185	8708	7948.48	8237.71	7953.56	0.0435053	9799.67	8593.32	9869.1	9306.46	0.0626594	7386.87	6710.09	6546.86	6562.51	0.0583779	3395.42	3566.45	3159.95	3290.55	0.0512312	1910.16	1741.41	2058.66	1907.85	0.0680612
166 -> 103.2	168.263	151.634	173.846	167.794	0.0578646	132.756	180.048	205.006	0.212601	180.561	218.803	220.682	214.157	0.0904341	106.309	116.71	137.065	113.337	0.111565	125.594	121.763	128.664	119.468	0.0328797	131.776	127.513	163.108	163.095	0.132503	127.53	125.468	117.577	169.695	0.173839	151.376	158.406	136.79	148.773	0.0604889	128.49	173.869	124.343	165.402	0.170562	128.469	122.85	135.936	148.662	0.0832957
166.1 -> 120.2	537.109	595.689	594.174	633.062	0.0670967	630.945	649.914	666.618	0.0274943	675.692	733.91	743.923	741.712	0.0447143	392.15	443.009	420.161	423.214	0.0498899	477.934	559.874	547.893	555.495	0.0720385	498.655	531.305	553.859	505.05	0.0486168	485.396	490.438	550.28	551.985	0.0703753	572.831	621.061	546.31	525.026	0.0731237	518.082	504.57	476.756	603.983	0.104322	540.953	529.845	497.038	504.658	0.0399373
167 -> 131.1	3198.08	4013.91	5179.36	5031.14	0.213387	3273.76	2723.28	3044.02	0.0917446	3776.96	3756.39	3523	3857.8	0.0385804	3662	3516.35	3677.24	3705.87	0.0232542	1965.76	2494.44	2357.21	2603.35	0.118235	2991.51	2848.6	2901.26	2726.63	0.0385891	2226.52	2298.07	2184.83	2047.8	0.0480936	4480.04	4098.22	3855.59	3974.61	0.0659952	1832.12	1609.08	2295.51	3929.76	0.433868	1530.13	1430.09	1478.61	1316.07	0.0635331
168 -> 149.8	689.634	882.007	1080.38	1067.82	0.197975	952.119	1196.38	1254.31	0.1414	1592.02	2026.95	2153.11	1978.32	0.124834	1045.71	1219.77	1408.48	1540.35	0.166063	890.149	1218.66	1401.9	1459.81	0.206403	694.439	944.806	1180.12	1049.32	0.212717	737.639	980.272	861.923	885.395	0.115292	799.295	1171.45	1129.22	1243.43	0.181211	2981.75	3028.5	2840.85	3356.21	0.0714441	927.435	991.29	1021.81	939.625	0.0456077
168.1 -> 150.2	645.766	783.274	1028.41	972.793	0.20514	956.696	974.799	984.976	0.0147344	1304.55	1485.44	1484.95	1554.94	0.0734935	875.863	1001.67	1070.87	1273.27	0.157434	814.84	974.112	1162.49	1123.83	0.155478	700.008	829.049	895.988	906.738	0.114121	753.086	738.422	756	777.253	0.0211729	762.128	837.116	895.696	960.597	0.0978494	3113.24	2642.63	2363.18	3063.76	0.127838	885.458	885.741	986.901	923.627	0.0519341
169 -> 151.1	4539.64	5253.63	5864.08	5718.58	0.111544	4185.12	4438.24	4760.86	0.0646812	4870.59	5770.47	6142.52	5945.68	0.0989179	4957.68	5045.52	5469.7	5795.25	0.0732326	3796.36	4384.15	4583.44	4570.66	0.085285	3740.07	4089.48	4426.27	3954.59	0.0709854	3571.74	3798.09	4007.91	3917.76	0.0493695	5144.15	5471.04	5263.64	5427.63	0.0283314	7738.87	10987	10355.3	10768	0.151094	4183.67	5497.35	5313.5	5497.84	0.123415
169 -> 151.2	5957.7	6894.52	7577.59	7516.2	0.107647	5624.08	5689.59	6030.7	0.0377628	6316.9	7426.28	7853.65	7447.92	0.0908252	6567.72	6523.1	7164.38	7259.98	0.0563126	4848.65	5463.11	5924.14	5578.09	0.0822067	4992.26	5218.05	5492.37	5243.37	0.0390606	4800.48	5024.96	5278.06	5043.01	0.038743	6816.64	7000.79	6905.09	7000.71	0.0127643	8944.02	11624.3	10869.5	11730.7	0.119564	5240.11	6258.33	6130.67	6492.49	0.0908313
169 -> 115.1	223.301	343.013	385.896	377.634	0.225911	231.913	284.995	336.396	0.183677	329.471	345.933	433.666	468.577	0.170766	260.393	325.836	442.846	474.763	0.266447	207.407	318.4	295.626	343.005	0.20288	247.524	282.786	308.273	273.499	0.0902418	201.732	246.334	240.641	223.09	0.0881042	342.889	360.146	360.422	369.145	0.0307101	408.841	2270.8	1934.41	2069.97	0.510301	171.556	833.44	925.672	920.513	0.509682
169.2 -> 151.2	3751.22	4363.49	4746.21	4639.61	0.101965	3595.39	3377.83	3628.07	0.0384941	4168.3	4661.53	4794.36	4642.05	0.0600011	4023.24	4038.71	4369.1	4339.89	0.0446654	3181.95	3371.67	3703.79	3699.46	0.0737162	3294.44	3273.49	3350.33	3159.19	0.024558	3050.2	2949.66	3203.15	3193.11	0.0392512	4574.35	4362.15	4186.52	4278.67	0.0380713	6256.86	7976.9	7505.95	8181.68	0.115413	3492.52	4042.97	4123.27	4190.18	0.080478
170 -> 152.2	762.669	879.473	968.088	980.723	0.112155	998.295	982.388	1124.41	0.0751804	990.611	1187.68	1307.51	1307.31	0.124769	833.325	926.446	919.489	1025.2	0.0847294	812.537	925.455	951.729	974.934	0.0785677	773.41	814.292	938.86	837.902	0.083697	816.146	834.635	779.76	835.108	0.0318235	860.608	947.118	896.292	995.656	0.0638167	1627.1	1576.99	1456	1708.84	0.066469	798.854	801.181	783.741	755.332	0.0268835
171 -> 134.9	415.625	510.181	593.84	624.137	0.174603	431.903	389.426	384.148	0.0651559	548.532	693.953	669.678	754.887	0.129863	764.792	778.004	793.596	822.625	0.0314984	327.174	409.451	446.508	465.391	0.148542	382.102	439.527	399.7	418.166	0.0601396	322.109	286.919	320.32	301.94	0.0540964	529.356	557.167	505.69	526.535	0.0399158	3238.62	3506.29	3257.66	3115.89	0.049901	1544.59	1659.89	1717.8	1735.96	0.0518515
175 -> 139	3520.23	4069.51	3972.65	3987.76	0.0639322	2518.14	2437.36	2406.79	0.0234435	2848.17	2370.18	2734.57	2614.64	0.0774834	2595.65	2743.93	2935.69	2964.47	0.0616293	2947.6	2736.44	2894.52	2887.27	0.0316608	2663.87	2285.46	2339.84	2048.59	0.108556	2032.72	2057.62	2111.79	2098.98	0.0176363	2876.71	2476.82	2461.12	2554.04	0.0748364	7109.09	5983.12	5358.14	5159.01	0.148716	3188.78	2845.31	2587.2	2713.25	0.0914572
175 -> 157.1	3392.4	3984.91	4370.04	4307.48	0.111433	3492	3425.15	3530.93	0.0153623	4293.68	4556.56	4693.92	4697.75	0.0415747	3665.4	3543.66	3878.52	3748.9	0.0379909	3037.18	3260.03	3536.1	3340.66	0.0626927	3093	3000.95	3280.94	3071.19	0.0384306	2527.32	2742.66	2842.56	2799.73	0.0512995	3418.25	3504.8	3212.99	3499.27	0.0400198	6977.78	6811.62	6282.35	6050.11	0.0668318	3684.16	3406.33	3508.84	3555.85	0.0325749
175.1 -> 70.3	2585.81	3024.27	2963.95	2788.86	0.0693836	1922.13	1896.48	1831	0.0249561	2179.36	2056.57	2330.57	2295.1	0.05598	2266.2	2303.79	2384.13	2269.63	0.023774	2243.97	2001.1	2162.16	2178.35	0.0480447	2127.85	1833.51	1859.44	1621.76	0.111535	1539.24	1590.8	1672.69	1572.64	0.0355964	2122.26	1827.31	1878.19	1881.31	0.0686624	5354.56	5388.06	4769.2	4278.56	0.106892	2724.4	2321.64	2347.82	2392.05	0.07666
177 -> 141.1	18702.4	20309.8	19856	19582.8	0.0345139	28789.7	27276.8	27203.1	0.0322627	39641.4	43282.2	41818.9	40425.6	0.0388331	19577.4	20219.4	20392.2	19553.6	0.0217347	22060.7	24983.2	25475.5	25188.6	0.0651082	25203.6	23907.1	26640.2	24313.2	0.0483928	20483.2	20442	21224.9	20774.3	0.017407	25947.4	24892.9	23398.5	24113.1	0.0444357	32678.4	31553.2	29208.3	31875.7	0.0475853	17808	19983.3	19233.2	19299.1	0.0478934
177 -> 159.1	18387.1	19862	20005.8	19145.2	0.0384581	28972	26792.1	26996.6	0.04364	37617	44318.7	39677.3	41246.6	0.0693882	19939.1	19862.3	20374.7	19299	0.0222357	22210.1	24847.1	25367.7	25362.2	0.0618069	25865.2	24699.7	26390.7	24612.2	0.034549	20229.3	20096.4	21999.6	21701.8	0.0468186	25281.2	24701	23510.3	23138.9	0.0414938	31873.2	31861.8	28988.7	31246.2	0.0441259	18158.1	19781.6	19288.9	19426	0.0366207
177 -> 159	42.7295	42.5727	60.7552	30.5741	0.281802	19.4169	28.9461	20.7044	0.224575	67.7817	64.0871	29.0411	24.6882	0.488735	43.6249	54.0191	61.7063	45.5721	0.162291	16.6054	37.3158	23.334	27.4774	0.331097	23.0445	12.8884	18.9423	36.0878	0.43215	21.6496	27.7377	23.5273	16.9869	0.198321	36.1827	16.9928	40.8471	45.21	0.357266	35.4607	26.2106	36.6801	32.8906	0.142481	33.9276	37.1919	28.1125	31.9422	0.115808
177.1 -> 160	31431	31209.4	32284.1	30953.3	0.0183391	25830.8	23431.2	23479.4	0.0565729	30633.9	29597.8	30229.1	30391	0.0146477	22281.2	20307.7	20876	20773.3	0.0404153	26071.8	24308.5	25389.8	24212.7	0.0357735	24068.3	21107	21322.3	19631.2	0.0859298	22376.7	20257	21022.2	20561.6	0.0444563	27177.9	24441.7	23114.7	23941.8	0.0713376	35539.4	32750.6	29054.3	28571.6	0.104456	18751.5	15608.9	14809.3	16133.6	0.104517
181.2 -> 74.3	2626.41	2709.89	2917.79	2796.31	0.0450881	3097.77	2901.4	2872.98	0.0413902	3371.42	3319.94	3235.07	3282.92	0.01747	2537.97	2552.99	2698.62	2729.46	0.0373889	2521.17	2566.33	2549.3	2612.69	0.0149729	2720.6	2651.55	2829.03	2702.15	0.0274176	2518.35	2439.47	2546.52	2480.9	0.0186103	3051.07	3393.32	3420.1	3532.36	0.0620097	2682.28	2646.51	2367.25	2779.57	0.0675628	1594.78	1642.05	1562.41	1620.19	0.0213494
182 -> 165.1	54.8849	49.8531	46.0442	65.4319	0.155501	55.7819	56.086	38.5885	0.199703	88.0657	85.3939	86.7729	68.4992	0.111793	42.7687	40.6563	50.9855	60.4474	0.18479	40.5711	24.871	39.4907	44.0837	0.227762	55.1637	39.6294	47.8032	65.6499	0.212437	61.0446	61.0985	52.2056	68.3107	0.108657	35.8135	58.6433	54.0786	42.3225	0.220026	113.088	74.2368	66.6553	61.0482	0.2986	71.0184	55.2604	49.8082	46.6066	0.194633
182 -> 91.2	44.4888	62.1811	56.2811	68.7777	0.178034	50.1584	52.017	48.8137	0.0319586	27.7999	64.315	69.085	68.926	0.346664	39.3045	32.2826	47.426	24.5845	0.271772	39.5117	37.136	46.2254	45.4707	0.106014	43.9962	38.4755	70.5675	44.6345	0.290742	41.5124	50.4219	59.1739	57.6509	0.15477	70.65	77.6576	67.4071	73.0624	0.0597933	26.8725	83.4004	62.6919	58.1365	0.404184	41.871	61.7196	77.8395	63.9267	0.241463
182.8 -> 165.2	24677.3	23719.8	22119	20966.8	0.0721758	25785.6	23276.9	22540.1	0.071286	30777.9	31429.6	30566	31185.5	0.0125837	15760.3	14637.8	14882.4	15071.4	0.0319505	28640.2	26881.7	27087.4	24719.5	0.0600938	23639.8	19945.3	20608.9	18321.5	0.107879	24161	21979.2	23258.2	23176.9	0.0386871	21713.3	19297.6	19233.1	19590.8	0.0591239	27796.2	25588.4	23218.2	23571.6	0.0843034	12996.4	11666.6	11562	11656	0.0572849
183 -> 164.9	18101.8	18136.2	17050.3	16571.6	0.0446741	18291.9	16882.6	17005.9	0.044873	23298.9	23749.9	23700.3	23927.2	0.0112099	13010.8	12264.9	12452.4	12646.7	0.025311	20166.1	19452.4	19811.3	18454.4	0.0378909	17078.8	14617.9	15126.1	13983.9	0.0878737	16749.6	15108.7	16551	16114	0.0453367	16763.7	15502.9	14932.5	15446.1	0.0497031	23065.6	21571.2	19289.8	19475.8	0.0864676	11298	10010.4	9578.92	10032	0.0725388
183 -> 165.1	17341.3	17702.5	16785.1	15945.7	0.0451424	17832.3	16469.1	16755.8	0.0422308	22110.5	22857.7	22665.8	22754.2	0.0147683	12491.3	11853.7	12220.4	12205.6	0.0214382	19523.8	18569.7	18994.9	17703.4	0.0411478	16471.1	14411	14336.5	13184.4	0.0936589	16453.4	15099	16057	15846.1	0.0358486	16034.9	14875	14636.3	14762.5	0.0428393	22052.4	21079.9	18570.5	19770.9	0.0746272	10787.1	9566.5	9515.94	9957.29	0.0590227
184 -> 125.2	685.296	665.89	608.436	641.419	0.0509991	527.353	385.436	361.545	0.211009	1346.33	1404.43	940.611	1025.79	0.195291	845.271	746.47	718.937	677.269	0.0956264	386.137	340.357	477.564	451.159	0.150404	456.06	350.771	357.97	326.109	0.153479	457.725	303.017	201.607	187.655	0.433336	774.135	611.76	607.649	608.059	0.126861	1260.23	955.508	1055.79	1109.32	0.116098	1178.06	957.534	1047.98	964.643	0.098916
184 -> 166.1	1205.08	1196.58	1124.37	1180.99	0.0308645	1347.18	1281.02	1252.65	0.0374992	1795.51	2138.13	1954.58	2044.87	0.0735612	1159.18	1144.06	1233.16	1232.7	0.0397133	1405.51	1345.49	1377.72	1339.04	0.0225194	1195.67	1064.15	1139.35	915.644	0.112473	1280.34	1002.84	1091.9	1120.54	0.102948	1284.49	1199.33	1091.89	1227.04	0.0672423	2813.57	2632.56	2553.42	2838.42	0.0511978	1516.67	1352.2	1460	1450.11	0.0472836
184 -> 166.2	1229.09	1114.1	1111.92	1115.84	0.0503982	1254.22	1138.56	1144.17	0.055317	1654.85	2027.93	1853.37	1817.2	0.0832625	1102.15	1055.26	1220.76	1110.45	0.0624529	1190.95	1205.29	1297.04	1181.4	0.0436243	1119.92	969.104	1022.86	939.236	0.0783631	1141.55	1057.69	1150.59	1075.7	0.0420857	1119.28	1141.15	1107.67	1088.3	0.0198377	2634.59	2437.2	2410.21	2627.55	0.0475841	1416.39	1234.94	1350.99	1437.31	0.0669627
185 -> 166.8	1830.57	2119.77	2465.58	2495.98	0.141442	1915.02	1784.41	1838.52	0.0355493	2458.79	2968.65	3112.84	3001.24	0.10086	1744.78	1824.06	2015.4	2090.98	0.0841621	1774.72	1959.79	2154.49	2172.28	0.0928204	1773.73	1612.78	1940.11	1747.77	0.0759692	1459.3	1452.69	1515.33	1512.05	0.0225242	2069.1	2130.02	1877.84	2025.96	0.0530372	3175.04	3338.61	3106.94	3640.12	0.0716237	1355.87	1558.01	1567.62	1579.19	0.0703235
185 -> 167.1	1780.12	2217.4	2560.91	2641.25	0.170559	1821.91	1788.71	1974.18	0.0531254	2433.81	3106.62	2981	2883.66	0.102724	1829.23	1709.82	1951.42	2201.89	0.109417	1724.21	1872.17	2092.12	2100.68	0.0937153	1730.92	1715.78	1858.91	1701.94	0.041282	1528.22	1526.22	1510.1	1554.61	0.0120472	2055.24	2131.87	2000.36	1995.54	0.0310287	2995.19	3439.9	3053.72	3712	0.10244	1421.11	1504.27	1585.05	1479.56	0.0454034
188 -> 171	190.13	157.915	143.201	199.593	0.153767	142.496	93.8515	132.326	0.208788	243.596	275.735	265.347	252.972	0.0542105	176.574	177.85	219.477	179.791	0.110098	147.453	160.077	172.394	170.343	0.0702871	94.9861	94.4714	94.1632	93.4143	0.00697439	83.4729	82.6286	99.5269	86.3868	0.0891888	113.432	77.1677	108.287	104.398	0.160653	276.134	280.659	215.586	194.901	0.178276	195.097	133.301	151.307	151.444	0.16663
192.5 -> 176.5	0.326277	0.205467	0.21719	4.9067	1.64732	0.226353	5.47826	0.200495	1.54426	0.244288	0.263047	0.284067	0.453402	0.309071	0.197576	0.175672	0.247356	0.176317	0.168946	0.190937	0.186021	0.192419	0.799705	0.891016	0.224651	0.22212	0.1732	0.277808	0.190408	0.202682	0.162065	0.158034	0.188797	0.120489	0.253832	0.213876	0.194294	0.336663	0.252611	0.357347	0.362462	0.318773	0.327161	0.0635555	0.177044	0.162292	0.162312	0.158078	0.0504278
192.8 -> 135	23014.4	22020.3	23511.9	22829.6	0.027149	26029.9	24356.9	24757.9	0.0348719	24518.1	22299.9	22056.4	23006.7	0.0482262	21124.2	18981.8	18195.2	18806.1	0.0662394	18047.2	16139.6	16498.1	16347	0.0520317	18762.6	16890.1	17149.3	16308.9	0.0607967	16325.9	15431.4	15720.7	15858.9	0.0235582	18939.1	16498.7	15584	15610.1	0.0947941	17765.2	17694.5	16566.6	16234	0.0457117	9495.9	8518.68	8197.02	8617.93	0.0637997
192.8 -> 175.1	30621.8	37793.8	37462.9	37813.7	0.0984828	38852.1	42275.7	44238.2	0.065231	45821.2	60625.8	59526.6	59674.7	0.125459	23172.4	25946.5	29232.4	30445.6	0.120931	34107.3	41057.2	41844.1	40632	0.0906046	34714.1	38947.2	43680.5	40431.6	0.0943432	32823.9	38379.1	40984.5	40402.8	0.0975337	38358.8	44563.8	42482.5	42184.8	0.0617127	15749.7	30129.2	27681.6	33787.7	0.29086	9044.12	15422.2	15714.7	16665.4	0.245267
192.8 -> 175	30703.9	39046.8	39854	38934.6	0.115978	36203.9	45103.4	47089.9	0.135453	41828.7	63774.4	63817.9	64989.2	0.191062	18025.5	22709.2	27750.8	29169.9	0.20815	34026.6	44636.3	45202.1	43817.1	0.126268	31701.8	40261.2	46660.2	42918.6	0.157393	31134.2	41477	45759	43685.2	0.160264	33262.7	45409.5	43388.6	44434.4	0.135375	14135.8	29818.5	25739.2	32161.9	0.314358	8224.5	15066.7	14922.9	15625.1	0.26028
195 -> 99.2	10209.8	10845.1	10546.3	10522.5	0.0246467	13582.4	13599.3	13848.4	0.0108895	18899.9	22372.6	20906.2	21408.4	0.0700445	9651.26	10432.8	10774.1	10776.8	0.050936	10616.3	12693.7	12995.2	13218.6	0.0965935	12557.6	12708.1	13740.7	12095.7	0.0543373	10497.2	10534.1	11214.3	11437.2	0.0436516	12144.2	12549.3	12207	12046.2	0.0178704	16635	17599.2	16252.3	18033	0.0482682	9825.25	10975.5	9942.46	10745.1	0.0552963
195 -> 158.9	15331.8	17337.3	16946.1	16493.9	0.0525373	23584	22308.7	22581.3	0.0294247	31448.3	36632.1	35178.7	34940.4	0.0636402	17509.1	18284.5	18546.1	18540.6	0.0268624	18016.4	21197.8	22298.8	21907.5	0.0933384	22093.2	21782.1	22698.1	20322.5	0.0464355	17065.5	18361.5	20028	18383.4	0.0657456	21426	20814.5	19368.7	20881	0.0426548	31748.3	34788.3	30557.2	30911.4	0.0601215	18256.7	19460.1	18527.8	19194.1	0.0297757
196 -> 136.1	7143.18	6319.23	6383.59	6205.65	0.0654963	7289.38	5864.24	5383.04	0.160442	14797.3	15073.2	10929.5	11669.3	0.161905	6417.64	5050.79	4949.47	5246.38	0.125365	9577.1	9252.97	10515.3	9596.74	0.0557983	6310.49	5360.31	5780.26	5254.23	0.0845495	4931.73	3482.35	3096.48	2916.46	0.253501	8361.94	7354.5	6751.3	6754.43	0.103925	23098	21734.7	19818.9	18284.2	0.102041	6826.62	5069.05	4435.71	6447.9	0.198279
196 -> 159.8	296.528	453.986	536.35	559.44	0.257764	459.009	429.243	559.4	0.141327	636.557	903.97	807.791	855.925	0.145415	467.729	519.737	675.022	787.938	0.23889	383.106	507.925	527.279	539.532	0.147278	476.929	476.214	536.395	492.864	0.0570249	331.454	389.447	412.499	395.511	0.0921625	478.828	606.262	495.683	581.851	0.116228	771.5	1213.52	907.003	1319.51	0.2436	499.342	746.305	710.679	703.441	0.168403
196 -> 178.9	7.47238	2.72586	1.38278	3.52778	0.692994	5.08587	1.25709	6.99058	0.657003	11.5955	28.9176	33.018	14.7756	0.47484	6.15121	4.04631	4.47051	8.39857	0.342671	6.75672	4.4397	15.8489	7.77213	0.570173	2.35293	2.74128	1.36828	8.50855	0.862817	5.66976	2.05282	3.12611	2.21716	0.511342	0.276908	2.6562	3.95713	1.16537	0.807092	27.8254	17.3755	18.3932	30.9494	0.286657	1.26882	4.59286	11.1995	1.79155	0.96832
196.9 -> 81.1	18747.9	20685.1	21913.8	21074.4	0.0650435	17976.5	18496.6	18770.5	0.0219008	19588.3	18177.5	19479.7	19135.7	0.0335986	15529.3	14229	14771.8	14950	0.0360401	18152.4	16990.9	17759.7	18177.6	0.0311538	17419.2	15988.2	17130.7	16252.5	0.0410526	13835	13411.8	13796	13818.4	0.0147991	19462.4	18851.3	17294.7	17033	0.0651003	13326.4	13691.1	13507.5	13114.3	0.0184155	8077.01	7736	6817.86	7854.08	0.0726829
197 -> 179.1	2076.19	2970.61	3325.76	3056.89	0.18979	2245.26	2648.45	2832.51	0.116627	3294.86	4335	4413.69	4441.08	0.134113	2246.28	2354.99	2585.24	2790.1	0.0973023	2695.52	3272.97	3307.02	3450.53	0.104669	2226.09	2577.66	2816.93	2372.19	0.102789	1829.63	2146.68	2350.21	2394.89	0.118129	2348.18	2940.21	2789.5	2835.77	0.095737	5179.2	5178.99	4946.74	5100.37	0.0214714	2666.9	2582.3	2523.25	2640.78	0.0245955
198 -> 180.3	311.748	337.931	368.709	350.076	0.0697909	454.241	369.451	449.235	0.112121	623.439	857.648	824.238	772.206	0.134462	405.512	496.706	595.971	563.721	0.163276	351.546	418.789	539.196	447.604	0.17716	294.967	358.301	377.536	365.672	0.105868	369.436	319.646	298.892	270.575	0.132542	285.8	328.375	364.237	395.1	0.137119	1459.6	1346.91	1168.21	1348.55	0.0905866	509.156	455.224	512.144	393.44	0.119507
199 -> 81.2	22738	24256.5	25791	25097.6	0.053721	21717.5	22080	21951.2	0.00838363	22430.3	20502.1	21655.6	22091.5	0.0387911	17569	16453.8	16929.8	16996.3	0.0268972	21304.3	19089.8	19785.6	20288.1	0.046313	20381.9	19164.1	19757.9	18954	0.0328425	15779.3	14692.4	16000.6	15562.4	0.0369378	23225.9	21326	19975.9	19680.6	0.0767895	16496.8	17529.1	16629.2	15750.3	0.0439458	10219.3	9224.75	8900.06	9892.77	0.0631532
205 -> 145.2	2342.63	2317.08	2375.62	2159.33	0.0417327	4310.03	3996.05	3831.89	0.0600474	4101.97	4745.9	4414.84	4559.68	0.0610284	2389.34	2921.37	2755.3	2742.69	0.0828537	7197.87	7204.59	7600.06	7194.82	0.0274721	3005.52	2694.3	2957.44	2687.69	0.0595427	3036.08	2469.42	2210.03	2269.41	0.150872	2646.17	2568.36	2439.63	2460.63	0.0381634	8449.34	7302.14	6096.73	6335.44	0.152	2873.43	2148.83	3081.12	1855.4	0.233693
205 -> 187.1	10467.1	10534.2	10853.2	10333	0.0209262	10314.9	9047.05	8907.12	0.0823062	15868.4	16171	15666.8	15272.3	0.0239426	7872.27	7200.24	7205.68	7174.06	0.0461431	11160.4	11021.4	11296.4	10758.3	0.0207823	10867.1	9552.93	10197.4	8977.77	0.0823748	10681.6	9453.57	9815.66	9367.36	0.0610731	11036.7	9496.38	9240.37	9460.62	0.0842709	16500.5	15686.3	14097.6	15174.7	0.0654644	7319.58	6109.7	6355.04	6419.23	0.0808346
219 -> 201	4275.42	4783.88	5088.24	4872.33	0.072411	4072.95	4099.53	4256.48	0.0239399	4903.91	5390.33	5580.82	5522.38	0.0574777	3806.84	3696.38	3984.86	4087.89	0.0450933	4232.4	4137.71	4604.6	4649.43	0.0587209	3910.81	3853.35	3802.35	3567.62	0.039806	3042.58	3110.44	3295.55	3051.51	0.0376343	4023.71	4063.08	3970.86	4096.45	0.0133784	7368.89	7212.92	6769.98	6841.78	0.0409551	3651.03	3577.66	3357.54	3588.9	0.0362011
219.1 -> 159.1	5179.24	5062.28	4170.64	4043.45	0.127767	9521.31	9243.64	8459.57	0.0606766	11982.4	13204.9	12465	12679.3	0.0402833	2912.86	3118.61	3040.37	2944.13	0.0311988	8320.68	9003.66	8766.74	8102.97	0.0480043	7798.43	7549.06	8156.71	8078.84	0.0351657	6155.12	5628.94	6382.64	5958.49	0.0529492	5725.01	6008.51	5693.21	5641.74	0.0285316	3905.43	4121.74	3477.63	3999.51	0.0722396	2126.41	2097.65	2589.23	2498.2	0.108365
219.3 -> 202.3	6.99256	12.5266	2.46148	2.53384	0.77713	11.6006	6.30529	7.4584	0.329367	17.2141	13.4242	11.6562	10.0726	0.234522	11.5516	6.03725	10.3166	10.2969	0.252826	6.58426	2.79032	6.11891	2.65527	0.463812	9.51221	5.61801	8.30783	5.16941	0.293189	12.8756	6.8362	7.95109	4.53113	0.437236	4.6459	9.721	6.92335	10.8768	0.34907	9.54117	2.74112	9.74381	11.9632	0.469703	10.9768	15.4231	1.50409	3.7886	0.811018
220 -> 201.9	2497.74	8629.47	9525.45	10534.6	0.463961	1697.01	6200.01	7715.2	0.601504	1371.69	8904.04	9242.92	9384.09	0.540829	1311.19	3588.29	6218.64	7566.58	0.595845	2127.86	6224.47	6538.75	6807.01	0.407525	997.476	6140.95	8496.17	7595.63	0.576889	659.724	3630.19	4080.59	4022.68	0.528671	1396.57	10956.8	9897.49	11350.3	0.560609	1509.6	3724.63	3384.65	4366.56	0.378065	882.655	1981.27	1860.07	2088.28	0.325783
225 -> 164.7	26130.1	23914.5	21311.8	20014.4	0.119353	37052	35895.1	31933.3	0.0767842	45181.4	45093.8	47262.4	44994	0.0238649	13695.1	13461.4	13147.8	13801.4	0.021412	45945.1	43652.4	43507.6	40225.5	0.0543047	31677.2	27869.8	29493.7	26805.9	0.0732367	21363.1	19604.6	22820.9	22691.1	0.0692111	26659	25707.6	25410.8	25476.4	0.0223878	16272.3	15757.2	15900.5	15375.9	0.0234168	10397.6	9153.83	9878.93	10933.2	0.0751784
225 -> 105.1	17354.9	15774.9	13977.5	13001.7	0.128474	25905.2	24574.5	22939.6	0.0606938	27330.5	29656.9	30138.4	30493.6	0.0484527	10039.3	9959.5	10144.5	10350.6	0.0167246	28994.5	28426.1	29112.6	25986.7	0.0518989	19843.9	18186.8	17597.5	17360.9	0.0613571	15078.5	13956.5	16478.3	14837.5	0.0692601	15870.7	15970	16153.4	15826.2	0.00910281	10761.5	10513.1	11152.3	11011.8	0.0259646	6763.52	6007.09	6316.84	6964.72	0.0664094
228 -> 210.1	817.298	2429.93	2939.24	3230.16	0.457331	1220.52	4178.83	4848.33	0.56515	713.54	4923.79	5636.95	5455.41	0.557644	714.173	1844.96	3106.59	3598.01	0.56057	1180.04	3669.16	3683.86	3702.02	0.409497	552.033	3442.85	4902.17	4456.18	0.585715	508.939	2913.77	3384.87	3144.27	0.535899	448.153	3917.19	3629.97	4260	0.575326	1718.64	3519.44	3183.24	3425.05	0.283849	714.693	1663.08	1767.7	1773.55	0.346382
285 -> 105	10171.4	10414.7	11001.7	10720.8	0.0341702	19668.7	18604.4	19055.9	0.027954	15447.1	16670.5	15950.1	16099.3	0.0313882	12610.6	11909.6	12413	12822	0.0313828	10182.6	11034.3	11929.8	11279.7	0.065065	7553.53	7270.22	7601.43	7036.89	0.0357561	8846.09	8387.25	8869.81	8868.39	0.0271466	11314.1	10873.9	10393.8	10897.5	0.0346167	11514.4	11527.8	10690.8	11338.6	0.034994	6766.56	6055.6	6097.43	6411.74	0.0521031
285 -> 225	26276.9	27591.6	28643	27766.6	0.0354321	51767.9	47297.4	47419.4	0.0521532	40733.8	42358.5	40654.8	40487.7	0.0212513	32311	29736.6	31995.8	32813.4	0.0429044	27886	27835.9	30554.8	29030	0.0443079	21641.9	19493.4	20146.2	18698	0.0623923	23778.2	21170.6	22172.7	22427.1	0.0479902	30950.8	28463.2	26912.9	27348.5	0.0636836	29262	28952.9	27830	28090.5	0.0239219	17368	15304.9	15268.7	16171.4	0.0615038
289 -> 271	618.563	797.759	888.017	802.465	0.145865	702.197	719.683	820.257	0.0852536	992.305	1216.08	984.613	1143.89	0.105586	604.044	697.698	801.663	805.505	0.132166	595.681	712.3	760.605	772.215	0.113537	559.707	622.434	653.698	553.394	0.081752	490.682	515.195	466.605	495.771	0.0406253	510.972	636.867	592.947	627.327	0.0966752	1230.99	1517.08	1347.6	1450.33	0.0901028	547.551	654.448	768.97	715.465	0.141484
290.9 -> 273	2413.47	2890.35	3060.61	3133.45	0.112639	2224.75	2230.36	2395.34	0.0424402	2548.19	2838.64	2855.65	2944.9	0.0615677	2231.94	2228.5	2364.33	2503.8	0.0560627	1838.71	2115.58	1976.03	2171.86	0.0737082	1954.57	1947.49	2110.89	2003.77	0.0376289	1577.48	1726.99	1785.26	1745.65	0.0531842	2141.12	2419.86	2298.24	2287.49	0.0498984	3725.26	3881.98	3713.88	3863.06	0.0233839	1823.14	1964.39	1962.84	2095.51	0.0567036
328.9 -> 246.8	9280.8	9381.27	9631.57	9137.06	0.0222591	10485.6	8658.61	9126.87	0.100701	16694.9	16753.7	17118	15594.6	0.0397608	7961.81	6878.51	6763.23	6747.73	0.0826169	9812.9	9854.12	10128.8	9535.43	0.0246944	8701.17	7577.96	7895.51	7468.39	0.0704363	8299.78	6858.28	7625.79	6970.6	0.089593	11975.5	10045	9535.56	9462.36	0.114698	7009.53	6944.12	6824.28	7456.08	0.0390918	4194.69	3857.98	3979.35	3897.79	0.0377253
338.8 -> 81.1	14585.8	15317.2	16073.9	15755.8	0.041759	11920.3	12091.2	12381.3	0.0192108	12703.6	11015.8	12800.3	12175.4	0.0673068	11165.9	9877.11	9686.29	10015.2	0.0654753	12477	11321.2	11342.1	11915.1	0.0466981	11938.2	10726.3	11353.7	10445.1	0.0599982	8732.31	8394.14	8789.06	8855.94	0.0236354	14442.8	13284.7	12576.9	12454.7	0.0691407	7474.64	8916.24	8829.96	8549.68	0.0786515	5573.36	4985.3	4625.45	5039.26	0.077309
338.8 -> 256.8	9561.87	10319.9	11100.2	10462.7	0.0609666	8104.96	7886	7968.93	0.0138422	8173.44	7947.11	8312.01	8710.93	0.0387175	7285.04	6751.89	6732.38	6930.05	0.0369788	7608.72	7195.73	7556.71	7441.44	0.0246639	7672.72	7006.71	7167.75	6994.55	0.0441225	5942.59	5685.59	5965.58	5938.06	0.0224596	8964.31	8714.37	8199.27	8161.32	0.0463284	5104.39	6118.53	5892.19	5915.03	0.0776644	3575.84	3315.43	3255.3	3235.21	0.0470292
344 -> 224.2	277.099	293.235	300.185	309.668	0.0465375	410.223	423.01	424.908	0.0190454	391.373	301.32	309.244	285.279	0.147415	296.72	295.96	283.355	299.862	0.0247579	204.586	235.707	234.193	245.478	0.0767841	199.142	184.484	177.634	151.542	0.111719	181.672	185.677	172.287	183.792	0.0328608	286.077	235.105	210.226	267.311	0.134924	250.822	280.954	238.166	228.587	0.0912554	120.762	131.332	115.29	119.654	0.0558862
344 -> 283.5	260.343	314.104	391.166	429.864	0.218265	498.026	552.338	598.162	0.0912228	432.202	543.473	539.282	569.224	0.116478	306.092	301.962	370.165	371.888	0.114733	391.742	464.916	449.189	467.215	0.0795709	286.697	266.668	301.68	275.166	0.05367	250.163	247.66	277.562	269.442	0.0559527	347.527	371.067	367.605	411.694	0.0718243	228.333	233.029	322.8	310.072	0.182116	178.207	188.226	154.256	186.579	0.0886077
346 -> 285.6	525.203	659.706	681.904	614.275	0.111803	796.395	933.474	875.72	0.079239	723.336	993.284	1025.39	984.291	0.150221	485.597	462.696	614.384	609.822	0.147697	684.239	792.047	877.128	896.663	0.119175	482.451	524.512	605.837	594.602	0.106209	358.901	482.968	491.856	457.068	0.136274	550.47	677.13	619.98	684.534	0.0981619	498.249	573.359	588.125	574.124	0.0729021	300.71	335.041	298.2	367.773	0.100951
386 -> 303.9	3193	3044.09	3320.59	3315.2	0.0404512	231.036	212.315	222.048	0.0422122	373.524	453.441	455.122	436.217	0.0892324	177.312	185.48	223.634	196.899	0.103156	268.618	229.302	238.285	248.327	0.0685991	200.336	187.095	226.234	209.56	0.0799098	109	137.962	158.192	135.092	0.149471	254.894	246.882	226.443	261.807	0.0618546	168.823	172.861	190.796	180.157	0.0541221	2536.09	2128.81	2116	2182.92	0.0887488
386.3 -> 371.3	0.191928	0.205467	0.499537	0.209987	0.537479	0.21928	0.21172	0.200495	0.0449029	0.244288	0.263047	0.312473	0.266707	0.106566	0.197576	0.702687	0.180992	0.176317	0.823883	0.215574	0.186021	0.192419	0.187431	0.0703928	0.242387	0.173362	0.1732	0.163416	0.194026	0.176013	0.245553	0.158034	0.15491	0.230456	0.330751	0.206976	0.194294	0.194229	0.286734	0.357347	0.396443	0.318773	0.490741	0.188761	0.206552	0.167702	0.162312	0.158078	0.128286
386.7 -> 244.7	19098.6	18925.5	18826.6	18582.1	0.0114363	18594	15995.8	16285.5	0.0839593	24947.4	25103.9	26352.8	25420.8	0.0247209	14520.7	12488.3	12122.5	12237.5	0.087938	18171.2	17469.9	18295.9	16852.6	0.0378794	16151.7	14132.3	14143.5	13277.8	0.0845404	13660.8	11906.2	12245.2	12396.7	0.0611045	21829.6	18731.6	18057.4	17348.5	0.10396	11919.3	10838.3	11220.3	11263.3	0.0396716	7681.72	6842.16	6493.86	6926.35	0.0715941
386.9 -> 247	16574.1	16804.9	17000.6	16357.1	0.0167319	16110.4	14137.1	13918.3	0.0820161	21233.8	21189.2	22441.7	21642.8	0.0268333	13283.2	11551.5	11080.9	11060.2	0.0894875	15162.1	14507.4	14829.7	13875.3	0.0375825	13945	11957.2	12003.9	11440.8	0.0893348	12033.3	10209.7	11049.5	10905.1	0.0680078	19315.8	16417.1	15335.2	15304.6	0.113744	10157.1	9266	9344.89	9538.62	0.0421395	6883.69	5737.69	5732.43	5936.56	0.0904088
386.9 -> 326.5	3727.78	3640.57	3529.44	3541.88	0.0257575	4411.13	3878.96	3644.57	0.0987377	7216.54	7396.39	7652.99	7059.65	0.0347473	2417.85	2372.64	2174.79	2398.88	0.0480017	4969.3	5226.99	5862.92	5177.25	0.0726498	3840.2	3291.11	3676.48	3318.42	0.0765949	2665.55	2190.98	2417.73	2429.31	0.0798956	4514.27	3910.97	4123.08	4052.31	0.0622299	3275	2640.3	2810.61	2976.83	0.0924179	2063.13	1797.68	1826.54	1802.87	0.0681799
387 -> 245	17603.7	16910.9	17494.2	16365.7	0.0335024	17899.7	15625.7	15280.6	0.0874685	24178.2	23329	24362.6	23528	0.0209031	12970.5	11489.1	11093.9	11192.2	0.0746484	17607.8	16658.4	17192.8	15529.8	0.0537312	15257.5	13052.1	13345.2	12931.5	0.0797195	12237	10413.6	11162.9	11080.5	0.0672138	20370.8	17394	16482.7	16307.9	0.106727	9870.28	9693.02	9999.15	9870.52	0.0127573	6913.67	6304.07	6021.63	6261.69	0.0595852
387.2 -> 371.2	3.16041	1.10952	5.74105	2.49185	0.621133	0.353677	0.198488	0.200495	0.354841	0.439718	0.771605	3.1058	1.0935	0.886296	2.57508	0.175672	0.199091	1.38703	1.05474	2.05104	0.198423	0.218075	0.593531	1.14502	0.183268	0.850557	4.86115	0.452119	1.3865	3.57893	0.18662	0.20742	0.445367	1.49716	0.269216	2.6079	0.544024	0.194229	1.26786	0.357347	0.419097	0.382527	0.327161	0.104859	0.424907	0.162292	0.633018	0.321425	0.511842
403.8 -> 288.2	196.662	202.59	224.277	190.157	0.0727652	115.376	150.202	161.051	0.167801	249.752	205.589	226.572	255.532	0.0977237	104.241	102.059	125.15	148.812	0.181637	102.527	93.5314	111.301	114.839	0.0903692	239.478	238.378	216.171	222.66	0.0505363	115.491	67.2079	89.8127	86.0721	0.221631	141.346	99.3487	116.9	103.602	0.16397	87.5977	89.6528	70.7356	49.5322	0.250163	79.9238	75.2332	85.7982	83.1489	0.0561301
407.1 -> 347	675.527	912.163	931.194	928.387	0.144435	859.774	841.21	802.479	0.0350309	1077.3	1376.63	1306.75	1397.79	0.113827	490.134	571.261	705.363	703.658	0.171108	818.018	1001.74	1081.8	1056.03	0.1203	636.289	689.151	778.5	721.375	0.0842974	479.828	471.83	486.291	517.498	0.0408826	648.588	802.689	721.032	764.841	0.0901042	795.026	848.966	846.405	848.143	0.0316638	402.646	472.216	436.928	502.793	0.0955848
442.2 -> 360.3	16438.5	16702.5	17237.7	16981	0.0205162	6430.99	5618.07	5406.98	0.0929213	11339	8456.45	9739.56	9707.36	0.120396	18958.9	15134.8	14167.3	14424.7	0.142265	10381.1	9175.9	8768.49	8317.53	0.096704	25207.2	21403.4	22756.4	20957.3	0.0846097	4896.34	4309.88	4152.97	4228.82	0.0770982	33193.4	25130.8	22287.4	22460.8	0.198634	3821.77	4122.03	3944.65	3450.27	0.0741572	8602.19	6978.27	6650.63	7214.02	0.116682
448 -> 388.5	747.334	890.959	936.001	885.2	0.0943318	298.631	254.342	269.485	0.0821085	444.278	316.209	367.383	405.075	0.142499	468.572	443.724	397.815	431.089	0.0676409	497.509	479.538	506.042	483.965	0.0248265	779.647	687.201	787.576	600.027	0.123841	154.353	152.901	164.034	156.077	0.0316754	927.519	778.963	743.143	758.088	0.106002	360.504	358.068	346.633	243.626	0.171293	486.518	390.28	312.132	460.438	0.18964
471.9 -> 359	27.1577	20.4987	18.9607	16.911	0.212356	16.0852	11.3006	16.3136	0.194327	65.4691	68.857	34.6372	34.8319	0.368483	19.3296	8.87728	15.9152	28.5281	0.449632	26.0907	32.9133	38.3555	29.3517	0.165789	14.289	5.52591	13.9311	18.9454	0.424074	15.3611	12.813	2.91869	22.007	0.596433	18.8913	11.6597	6.81325	10.5207	0.422356	46.5266	20.3545	15.2373	24.0354	0.520194	12.9183	13.1835	7.08222	12.2194	0.253256
514.6 -> 398.7	6428.54	6866.54	6975.29	6862.88	0.0357046	5801.86	5718.51	5601.7	0.0176167	6507.46	6113.05	5709.71	6542.21	0.0628551	5056.61	4571.98	4764.75	4611.64	0.0462808	6425.66	5457.76	5401.03	5565.23	0.0840876	6247.64	5393.89	5589.5	5203.12	0.0810071	4805.93	4399.9	4558.82	4541.72	0.0368547	6940.1	6382.05	5703.27	5712.42	0.0963137	5191.29	5461.28	4699.83	4660.17	0.0778327	2937.97	2790.69	2418.87	2656.41	0.0816149
522.9 -> 342.9	632.376	683.115	742.109	779.171	0.0912414	1381.52	1178.81	1297.17	0.0791924	780.41	809.107	862.105	873.163	0.0528252	992.413	854.005	892.575	899.446	0.0645478	583.036	609.641	685.69	699.873	0.0884723	393.14	381.797	382.351	358.073	0.0390581	441.228	364.361	396.868	403.919	0.0785438	738.991	630.664	606.23	590.637	0.104367	804.126	722.433	789.238	839.746	0.0622511	445.302	432.351	427.022	473.28	0.0465073
678.1 -> 618.3	12634.2	13801.8	14833.7	15925.3	0.0984857	17276.2	17920.1	18245.3	0.0276877	19794.7	16815.2	17184.3	20480	0.0990478	12940.6	11116.6	11433.7	12769.1	0.0765716	17570.1	16393	17321.6	17610.8	0.0330061	12750	11998.3	13092	12279.7	0.0388159	5935.95	5952.38	5278.13	5660.19	0.0552988	25026.4	22747.6	21042.2	21916.2	0.0754018	16876.5	17774.1	15983.5	13722.2	0.108087	12680.9	10699.1	10636.9	12627.2	0.0983762
[truncated: 238 more columns]
